# Supplementary material
Source: publisher figshare collection journal article supplement (https://karger.figshare.com/ndownloader/files/6487908)
Supplement: Supplementary file 1 [file 6487908]

**Table 1.** Gene symbol, assay ID, reference gene number, assay position, and amplicon length of the target and housekeeping genes.

| **Gene Symbol** | **Assay ID** | **Reference Sequence** | **Assay Position** | **Amplicon Length** |
| --- | --- | --- | --- | --- |
| SFTPD | Ss03394060_m1 | NM_214110.1 | 244 | 76 |
| DMBT1 | Ss03380964_u1 | NM_001048188.1 | 3957 | 91 |
| PGLYRP2 | Ss03381121_u1 | NM_213738.1 | 1751 | 91 |
| SLC30A7 | Ss03819782_s1 | NM_001136211.1 | 1050 | 104 |
| CTNNA1 | Ss03373761_s1 | AK348083.1 | 2756 | 89 |
